# Supplementary material
Source: PubMed Central journal article supplement (PMC5698061)
Supplement: ASN.2016101074SupplementaryData.pdf [file ASN.2016101074SupplementaryData.pdf]

## Supplemental figure legends

### Supplemental Figure 1

Changes in the indicated parameters measured before and after intermediate-dose glucocorticoid therapy. Nearly all patients receiving glucocorticoid retained their renal function at the last follow-up (0.2-15.0 years), with significantly decreased urinary protein ( $p < 0.005$ ) and serum IgM levels ( $p < 0.001$ ). There was no significant change in renal function.

### Supplemental Figure 2

Representative images from an IgMPC-TIN patient and control TIN patients showing renal immunohistochemical dual staining for IgM and CD138 (A-D) and renal immunohistochemical staining for IgG4 (E-H) and averaged numbers of infiltrating IgM-positive plasma cells per high-power field of renal interstitium in patients with IgMPC-TIN ( $n = 13$ ), IgG4-RD ( $n = 12$ ), TIN with Sjögren's syndrome ( $n = 15$ ), other TIN ( $n = 17$ ) (I). Images are from an IgMPC-TIN patient 1 (A, E), IgG4-related kidney disease patient (B, F), Sjögren's syndrome patient (C, G) and drug related TIN patient (D, H). The photomicrographs show that the numbers of infiltrating IgM-positive plasma cells per high-power field of renal interstitium are markedly higher in patients with IgMPC-TIN than control patients with TIN. On the other hand, the photomicrographs also show that the numbers of infiltrating IgG4-positive plasma cells per high-power field of renal interstitium are markedly higher in the patient with IgG4-related kidney disease than in patients with IgMPC-TIN or other control patients with TIN. Bar = 20  $\mu\text{m}$ . (I) Infiltration by IgM-positive plasma cells was significantly greater in IgMPC-TIN than IgG4-RD, TIN with Sjögren's syndrome or other TIN.

\* $p < 0.001$ . \*\* $p = 0.001$ .

### Supplemental Figure 3

Representative images from IgMPC-TIN patient 1 showing renal immunohistochemical staining for lambda (A) and kappa (B) light chain. The photomicrographs show that infiltrating plasma cells in the renal interstitium stained positively with both anti-lambda and anti-kappa light chain monoclonal antibodies; no monoclonality was confirmed. Bar = 20  $\mu\text{m}$ .

### Supplemental Figure 4

ROC curve of the predictive value of the numbers of infiltrating IgM-positive plasma cells per high-power field for diagnosis of IgMPC-TIN. The optimal predictive cutoff number of infiltrating IgM-positive plasma cells was 13 per high-power field, with an area under the ROC curve of 0.99 (95% CI, 0.979-1.007;  $p < 0.0001$ ). The sensitivity and specificity were 100% (95% CI, 75.3%-100%) and 93.2% (95% CI, 81.3%-98.6%), respectively.

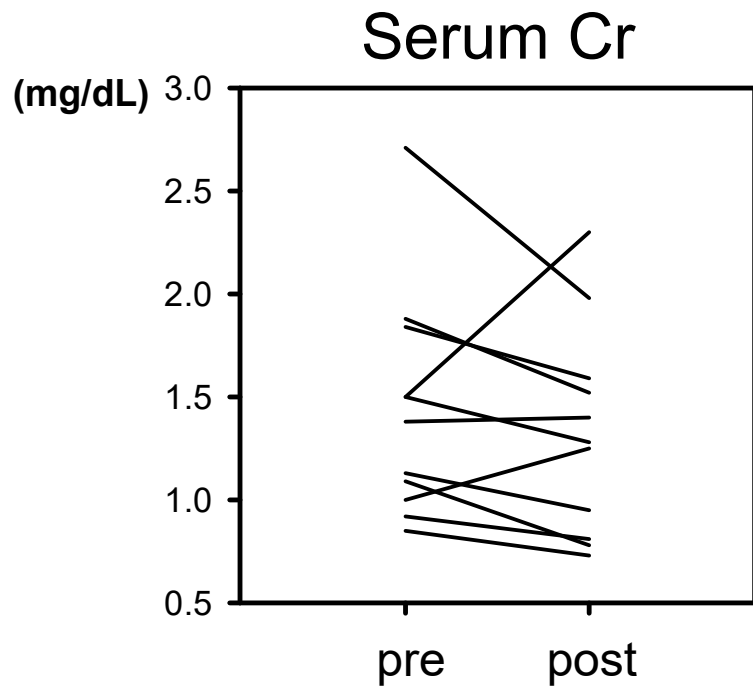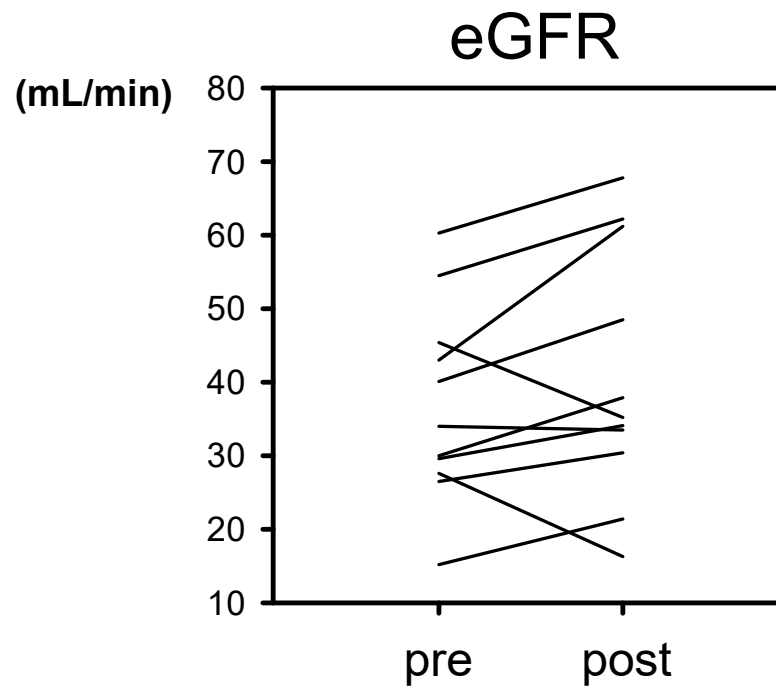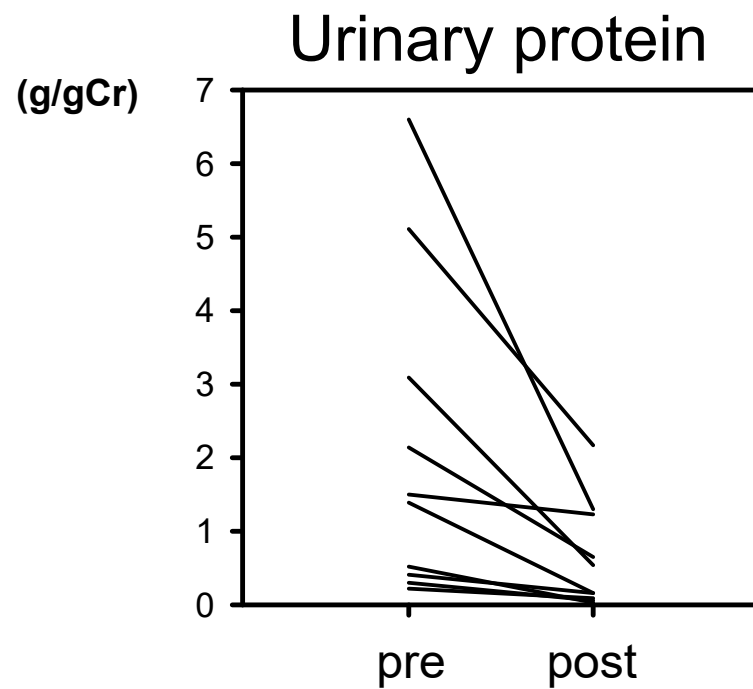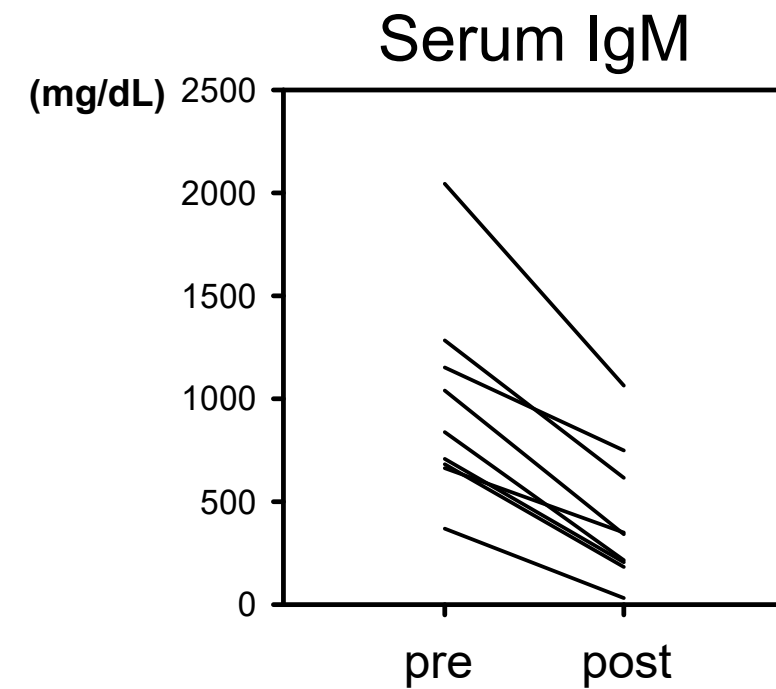

Supplemental  
Figure 1

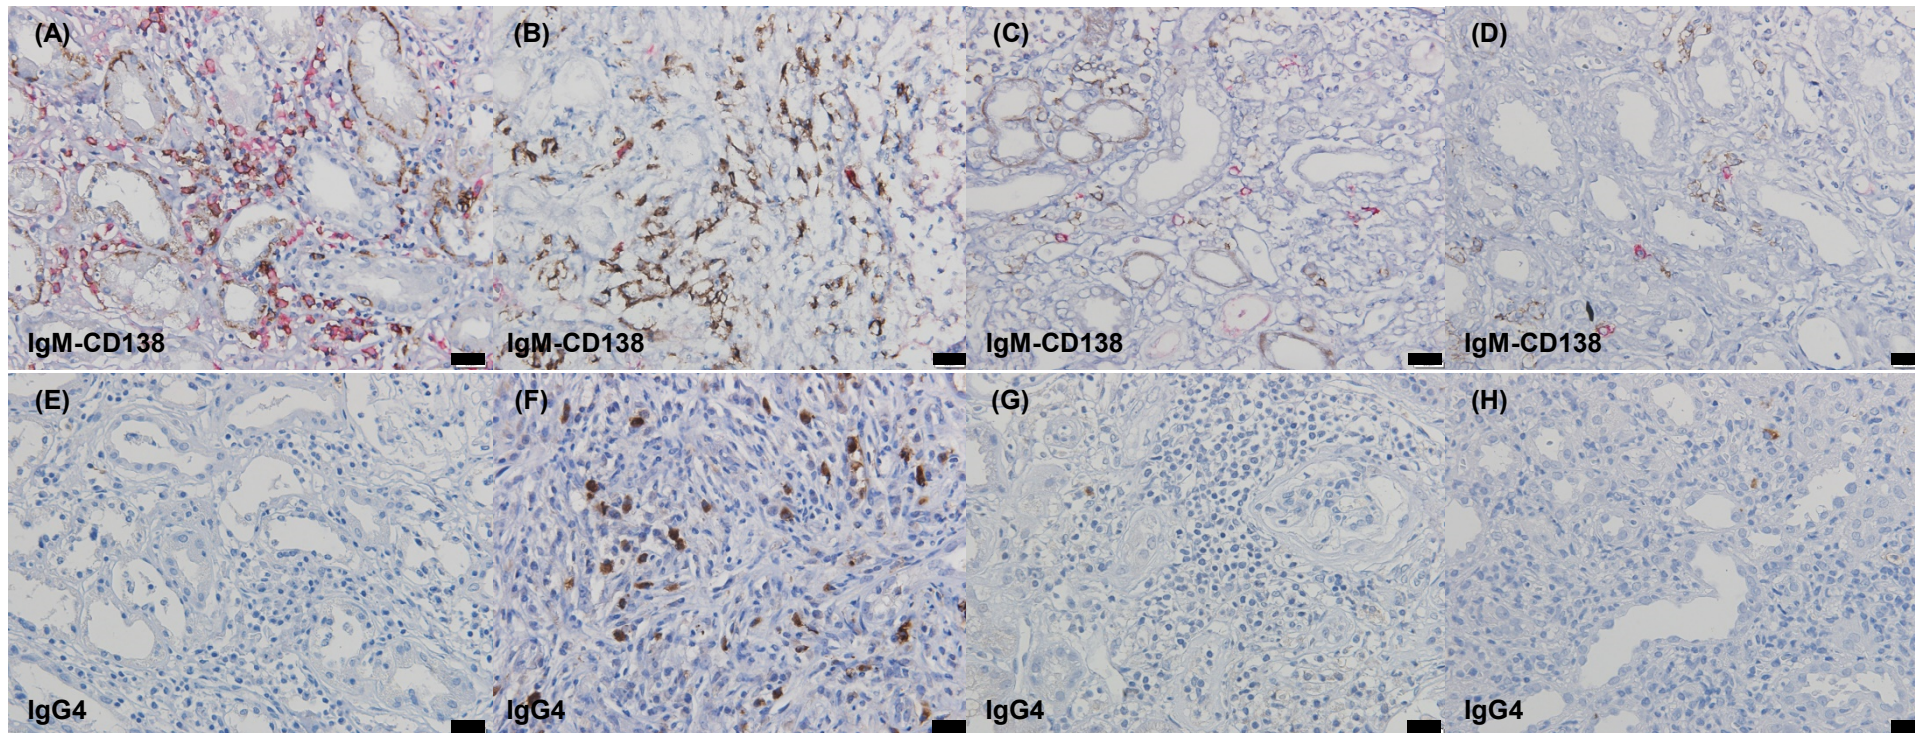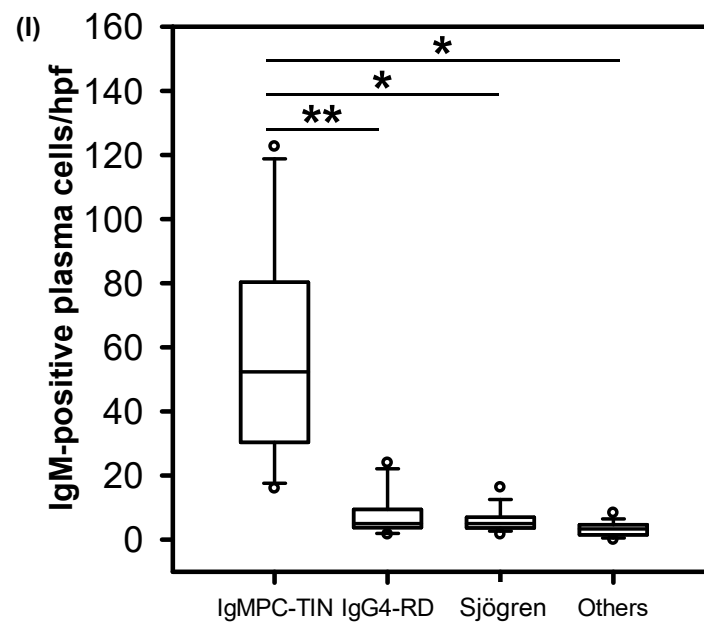

Supplemental  
Figure 2



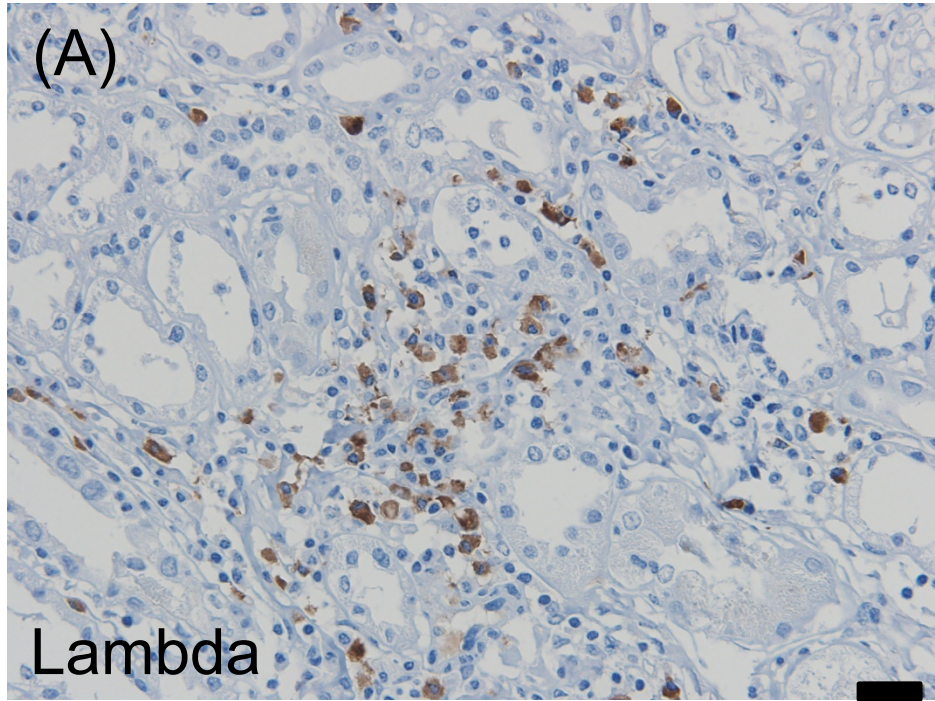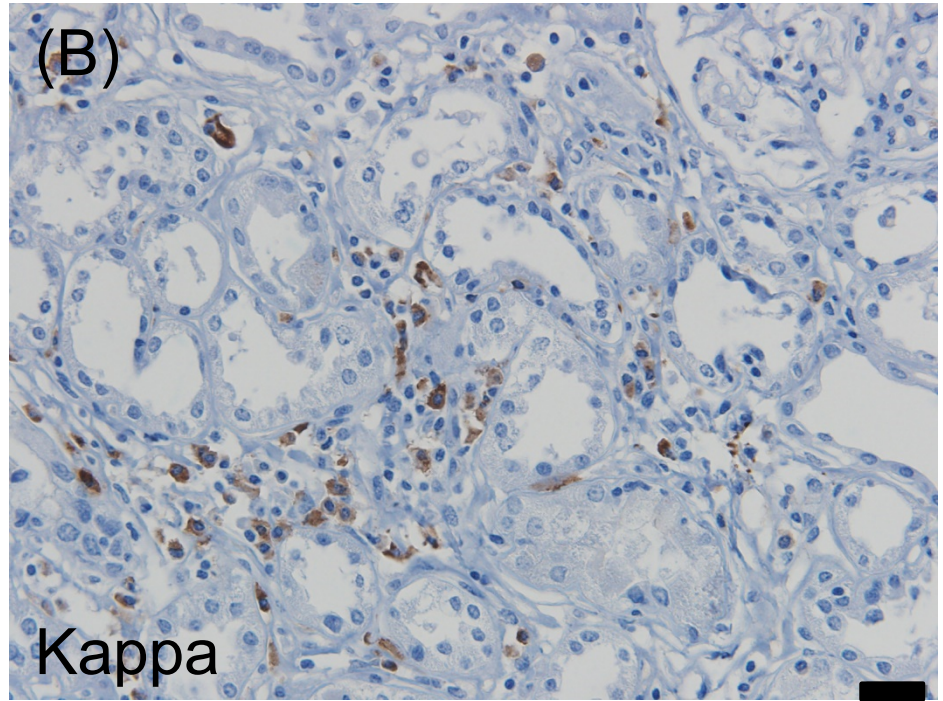

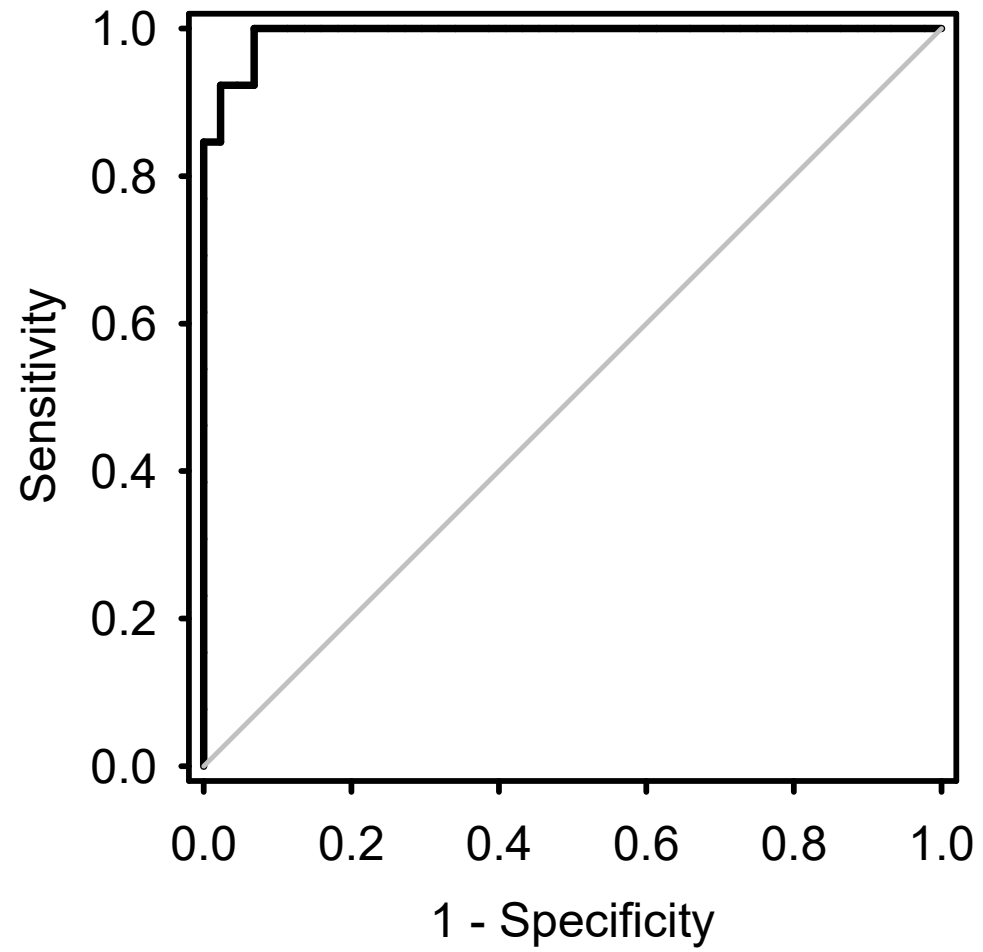

Supplemental  
Figure 4
